# Supplementary material for: The molecular biology of rotaviruses X: intercellular dissemination of rotavirus NSP4 requires glycosylation and is mediated by direct cell-cell contact through cytoplasmic extrusions
Source: Springer Nature journal article supplement (doi:10.1007/s00705-011-1174-x), 2011-11-24
Supplement: MOESM1 [file 705_2011_1174_MOESM1_ESM.docx]

**
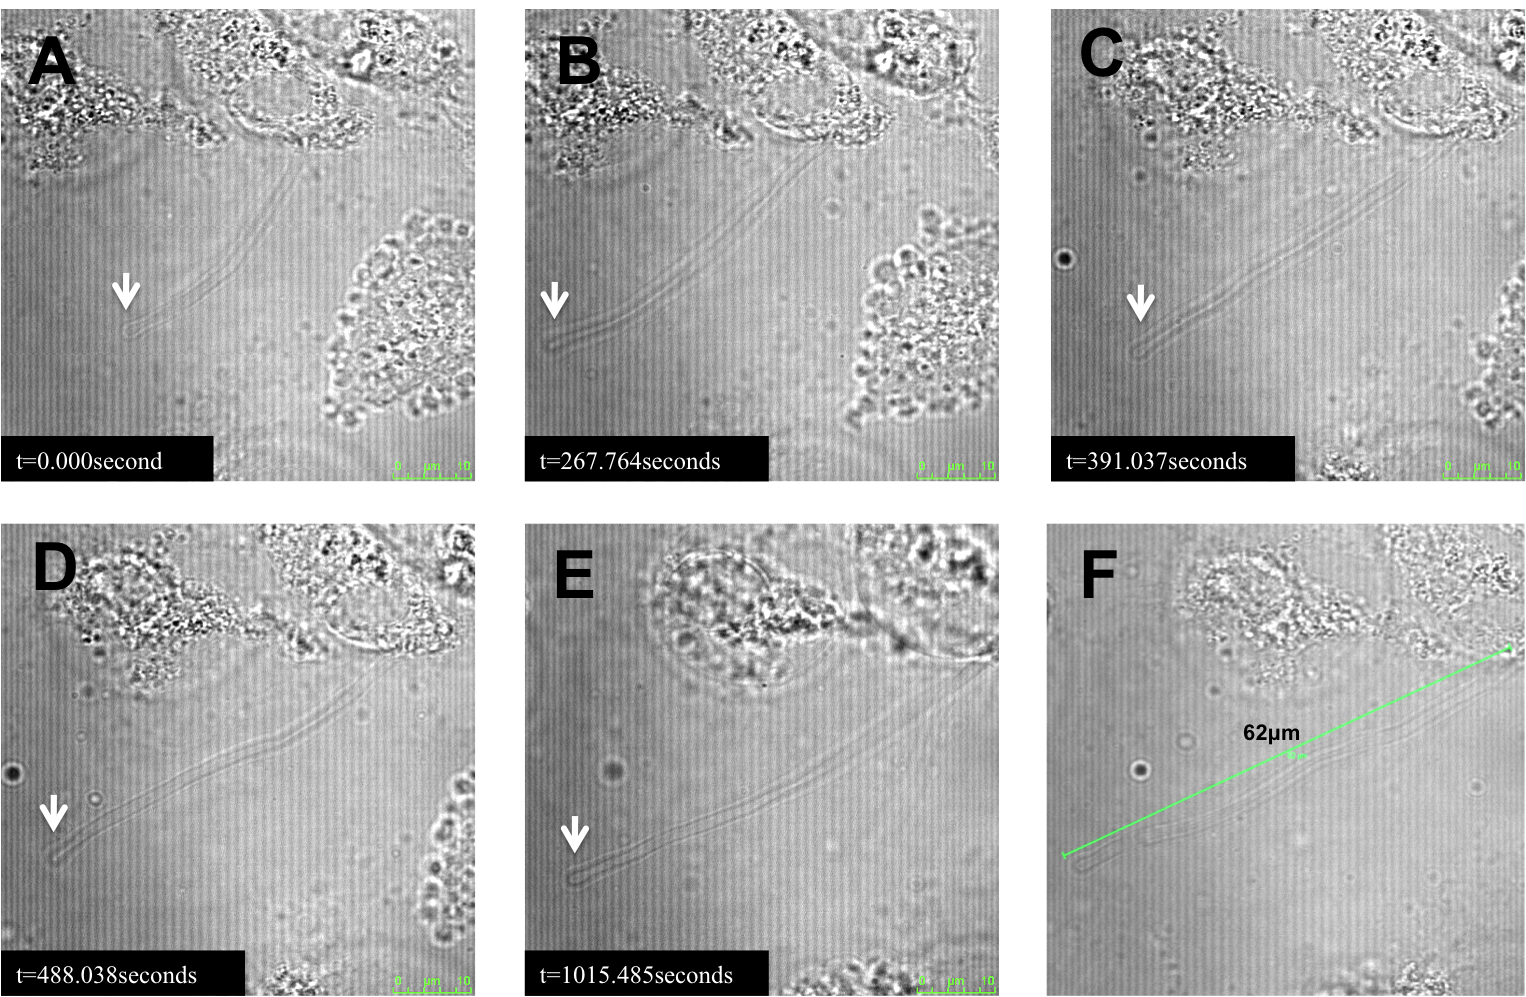
**

**Figure S1: Real time transmission confocal microscopic examination of virus-infected cells.**

BSC-1 cells were infected with virus at an MOI of 10. Real-time transmission confocal microscopy of the infected cells was started at 12 hpi. (A) A cellular extrusion was initially captured being extruded from a virus-infected cell. (B) The cellular extrusion elongated and reached the edge of the viewing area. (C, D and E) As the cellular extrusion elongated, the viewing area was moved to fit it in the observation area. (F) Measurement of its maximum length showed that extrusion reached 62 μm.

Images were recorded using a resonant scanner with highest scan speed and took less than one second to collect, with single step scan images being taken. The time of recording is indicated on the bottom left of each image and arrows indicate the elongating cytoplasmic extrusion. Bar = 10 μm.


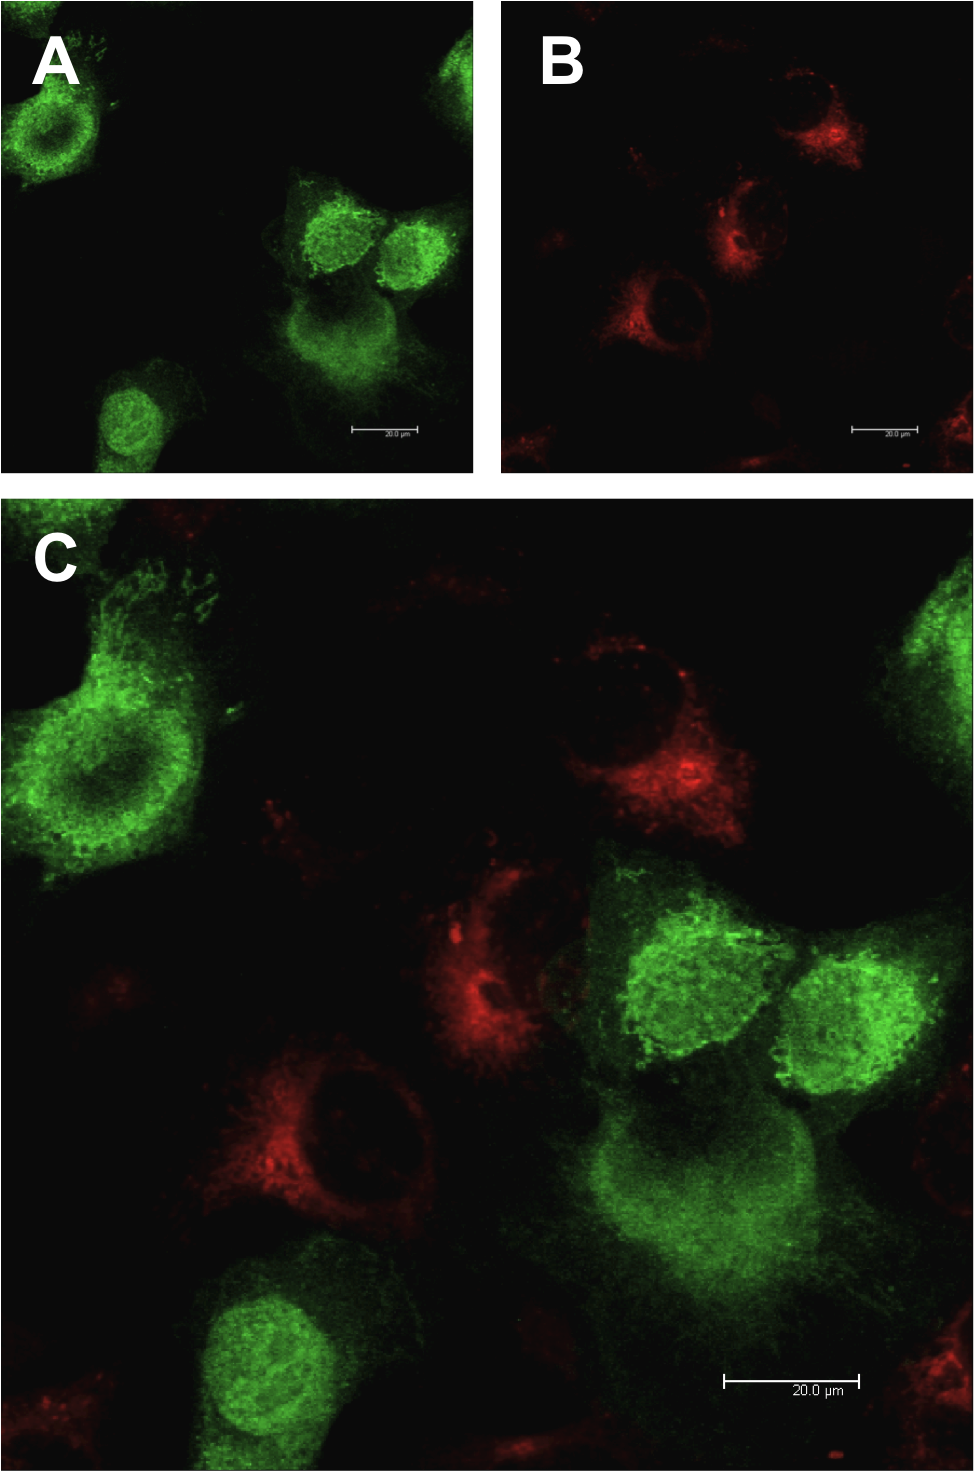


**Figure S2: Cell Trackers staining of Mock infected BSC-1 cells.**

BSC-1 cells were divided into separate wells of a culture dish and stained with either CellTracker Green or Red Cell. After one hour of incubation cells were washed extensively, mixed, and incubated at 37 ºC for 24 hours. Subsequent observations were made using these live i.e. unfixed cells. Panel A shows BSC-1 cells fluorescing in the green channel demonstrated that CellTracker Green stained the whole cytoplasm of cells. Panel B shows BSC-1 cells fluorescing in the red channel demonstrated that CellTracker Red stained an area surrounding nuclei. Panel C shows a merged image of panels A and B showing that the Cell Trackers were distinguishable from each other. Bar = 20 μm.
